# Supplementary material for: Unique Organization of Actin Cytoskeleton in Magnocellular Vasopressin Neurons in Normal Conditions and in Response to Salt-Loading
Source: eNeuro. 2020 Apr 7;7(2):ENEURO.0351-19.2020. doi: 10.1523/ENEURO.0351-19.2020 (PMC7189486; doi:10.1523/ENEURO.0351-19.2020)
Supplement: Extended Data Figure 3-2 — Statistical analyses characterizing parameters of actin networks in neurons from different brain areas. Download Figure 3-2, XLSX file. [file enu-eN-NWR-0351-19-s05.xlsx]

## Sheet: Sheet1
Figure 3-2
Non-parametric statistics
Subcortical actin intensity
	SON	PVN	CX	SCN	ARC	PRV	CA1	CA3	DG
Number of values	67	60	24	36	45	14	23	30	30
25% Percentile	4765	5129	-154.1	9.663	1100	443.9	1611	1749	2444
Median	5704	5936	80.97	275.7	2397	2004	2193	2784	3373
75% Percentile	6697	6992	800.7	1314	3912	2904	2918	3362	4610
IQR	1932	1863	954.8	1304.34	2812	2460.1	1307	1613	2166
Mean	5762	5977	223.5	752.4	2578	1985	2280	2608	3581
Std. Deviation	1542	1212	1012	1376	1812	1417	1075	1015	1668
Std. Error of Mean	188.3	156.5	206.6	229.4	270.1	378.7	224.2	185.4	304.4
Subcortical actin thickness
	SON	PVN	ARC	PRV	CA1	CA3	DG
Number of values	64	60	39	15	35	23	28
25% Percentile	0.2967	0.2842	0.187	0.18	0.2233	0.22	0.2475
Median	0.32	0.3033	0.243	0.19	0.2533	0.25	0.2667
75% Percentile	0.3367	0.32	0.285	0.23	0.2767	0.28	0.2992
IQR	0.04	0.0358	0.098	0.05	0.0534	0.06	0.0517
Mean	0.3179	0.3014	0.2493	0.204	0.2501	0.2472	0.2748
Std. Deviation	0.02921	0.02847	0.06785	0.03924	0.04347	0.05551	0.04505
Std. Error of Mean	0.003652	0.003676	0.01087	0.01013	0.007348	0.01157	0.008513
Actin comet density
	SON	PVN	CX	SCN	ARC	PRV
Number of values	64	60	25	33	39	15
25% Percentile	10.25	10	0	0	0	1
Median	12	11	1	0	1	3
75% Percentile	13.75	12	2	1.5	3	5
IQR	3.5	2	2	1.5	3	4
Mean	12	10.75	1.16	1.061	1.41	2.933
Std. Deviation	2.507	2.297	1.313	1.657	1.601	2.154
Std. Error of Mean	0.3134	0.2965	0.2626	0.2885	0.2564	0.5561
Actin comet length
	SON	PVN	CX	SCN	ARC	PRV
Number of values	64	60	14	16	27	13
25% Percentile	0.7372	0.8422	0.2499	0.2305	0.233	0.214
Median	0.835	0.9588	0.3154	0.2686	0.333	0.3588
75% Percentile	0.9206	1.079	0.3755	0.3218	0.363	0.3983
IQR	0.1834	0.2368	0.1256	0.0913	0.13	0.1843
Mean	0.8405	0.9791	0.3201	0.281	0.3161	0.3289
Std. Deviation	0.2015	0.1934	0.09299	0.0603	0.09162	0.107
Std. Error of Mean	0.02518	0.02497	0.02485	0.01507	0.01763	0.02967
