# Supplementary material for: Unique Organization of Actin Cytoskeleton in Magnocellular Vasopressin Neurons in Normal Conditions and in Response to Salt-Loading
Source: eNeuro. 2020 Apr 7;7(2):ENEURO.0351-19.2020. doi: 10.1523/ENEURO.0351-19.2020 (PMC7189486; doi:10.1523/ENEURO.0351-19.2020)
Supplement: Extended Data Figure 6-4 — Statistical analyses characterizing parameters of actin networks in neurons from different brain areas in control and SL rats. Download Figure 6-4, XLSX file. [file enu-eN-NWR-0351-19-s11.xlsx]

## Sheet: Sheet1
Figure 6-4
Non-parametric statistics
Subcortical actin intensity
	CX-EU	CX-SL	SCN-EU	SCN-SL	ARC-EU	ARC-SL	PRV-EU	PRV-SL
Number of values	24	23	36	32	45	26	14	8
25% Percentile	-154.1	-24.96	9.663	539.2	1100	812.6	443.9	244.2
Median	80.97	192.7	275.7	1579	2397	2323	2004	615.9
75% Percentile	800.7	490.1	1314	2096	3912	3235	2904	2209
IQR	954.8	515.06	1304.34	1556.8	2812	2422.4	2460.1	1964.8
Mean	223.5	204.9	752.4	1343	2578	2252	1985	1097
Std. Deviation	1012	401.8	1376	1024	1812	1560	1417	1237
Std. Error of Mean	206.6	83.78	229.4	181.1	270.1	306	378.7	437.3
Subcortical actin intensity (continue)
	CA1-EU	CA1-SL	CA3-EU	CA3-SL	DG-EU	DG-SL
Number of values	23	37	30	33	30	35
25% Percentile	1611	1898	1749	1404	2444	2915
Median	2193	2356	2784	1880	3373	3226
75% Percentile	2918	3151	3362	2471	4610	3903
IQR	1307	1253	1613	1067	2166	988
Mean	2280	2395	2608	1998	3581	3388
Std. Deviation	1075	1069	1015	808.7	1668	1200
Std. Error of Mean	224.2	175.8	185.4	140.8	304.4	202.8
Subcortical actin thickness
	ARC-EU	ARC-SL	PRV-EU	PRV-SL	CA1-EU	CA1-SL	CA3-EU	CA3-SL	DG-EU	DG-SL
Number of values	39	25	15	8	35	31	23	36	28	35
25% Percentile	0.187	0.16	0.18	0.1567	0.2233	0.2333	0.22	0.2283	0.2475	0.2367
Median	0.243	0.25	0.19	0.21	0.2533	0.2567	0.25	0.2417	0.2667	0.2733
75% Percentile	0.285	0.285	0.23	0.2238	0.2767	0.2867	0.28	0.2592	0.2992	0.2933
IQR	0.098	0.125	0.05	0.0671	0.0534	0.0534	0.06	0.0309	0.0517	0.0566
Mean	0.2493	0.2339	0.204	0.1973	0.2501	0.2594	0.2472	0.2408	0.2748	0.268
Std. Deviation	0.06785	0.06089	0.03924	0.03427	0.04347	0.03689	0.05551	0.02119	0.04505	0.03664
Std. Error of Mean	0.01087	0.01218	0.01013	0.01212	0.007348	0.006626	0.01157	0.003532	0.008513	0.006194
Actin comet density
	CX-EU	CX-SL	SCN-EU	SCN-SL	ARC-EU	ARC-SL	PRV-EU	PRV-SL
Number of values	25	23	33	37	39	25	15	8
25% Percentile	0	0	0	0.5	0	0	1	2
Median	1	0	0	2	1	1	3	2
75% Percentile	2	1	1.5	2	3	2	5	2.75
IQR	2	1	1.5	1.5	3	2	4	0.75
Mean	1.16	0.8696	1.061	1.622	1.41	1	2.933	2.25
Std. Deviation	1.313	1.546	1.657	1.32	1.601	0.866	2.154	0.8864
Std. Error of Mean	0.2626	0.3224	0.2885	0.217	0.2564	0.1732	0.5561	0.3134
Actin comet length
	CX-EU	CX-SL	SCN-EU	SCN-SL	ARC-EU	ARC-SL	PRV-EU	PRV-SL
Number of values	14	8	16	28	27	17	13	8
25% Percentile	0.2499	0.2528	0.2305	0.2254	0.233	0.215	0.214	0.2467
Median	0.3154	0.285	0.2686	0.2707	0.333	0.257	0.3588	0.2663
75% Percentile	0.3755	0.366	0.3218	0.3673	0.363	0.2985	0.3983	0.3438
IQR	0.1256	0.1132	0.0913	0.1419	0.13	0.0835	0.1843	0.0971
Mean	0.3201	0.3003	0.281	0.2989	0.3161	0.2773	0.3289	0.3622
Std. Deviation	0.09299	0.06127	0.0603	0.1058	0.09162	0.1009	0.107	0.2487
Std. Error of Mean	0.02485	0.02166	0.01507	0.01999	0.01763	0.02447	0.02967	0.08791
